# Supplementary material for: Synthesis of uniform silica nanospheres wrapped in nitrogen-doped carbon nanosheets with stable lithium-ion storage properties
Source: Springer Nature journal article supplement (doi:10.1007/s10853-019-03812-1), 2019-07-05
Supplement: MOESM1 [file 16905382]

Figure S1. The galvanostatic discharge-charge profiles of the pure SiO2 nanospheres (100nm in diameter) at a current density of 0.1A g-1 between 0.01V and 3.0 V vs. Li/Li+.

Figure S2. The rate capability of the pure SiO2 nanospheres (100nm in diameter) at various current densities.

Figure S3. (a) Cycling performance of the carbon material after silica etching process at a current density of 0.1 Ag-1. (b) The rate capability of the above carbon material at various current densities.


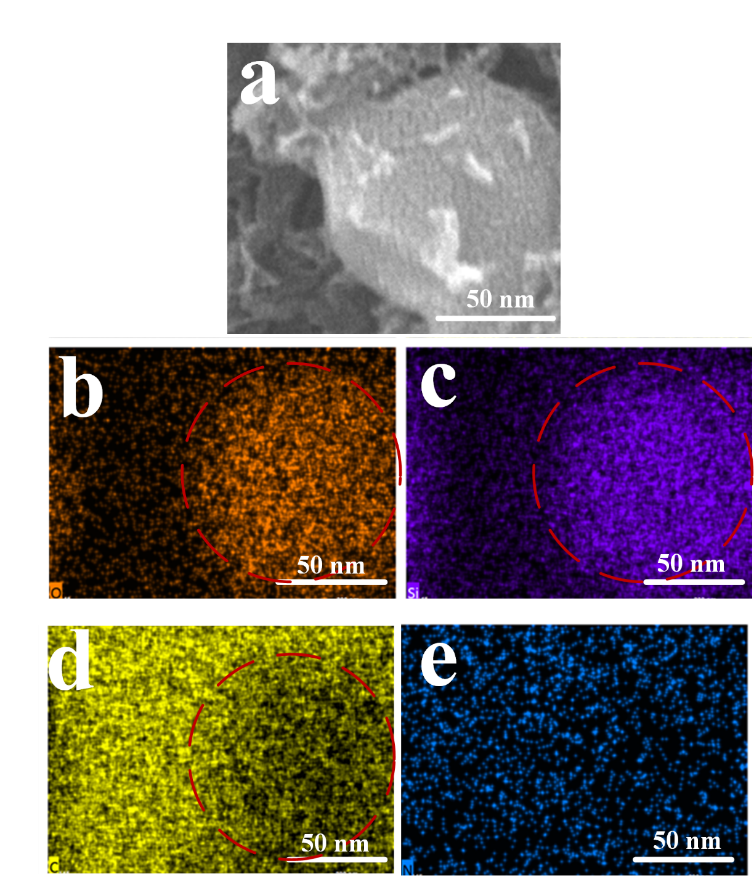


Figure S4. FESEM image and elemental mapping of NCSCs 1. (a) FESEM image of NCSCs 1, (b) O-K mapping, (c) Si-K mapping, (d) C-K mapping, (e) N-K mapping.


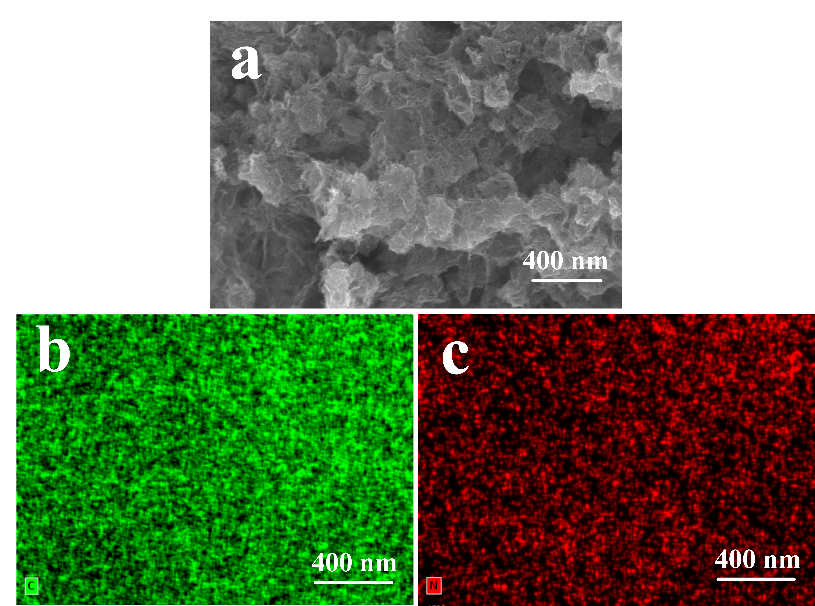


Figure S5. FESEM image and elemental mapping of carbon material formed after SiO2 etching process. (a) FESEM image of carbon material, (b) C-K mapping, (c) N-K mapping.
